# Supplementary material for: New representation of water activity based on a single solute specific constant to parameterize the hygroscopic growth of aerosols in atmospheric models
Source: Copernicus journal article supplement (doi:10.5194/acp-12-5429-2012), 2012-06-22

NH<sub>4</sub>SO<sub>4</sub> with dry diameter d=0.05[μm] at T=298.15 [K] - v<sub>i</sub> = 1.661410

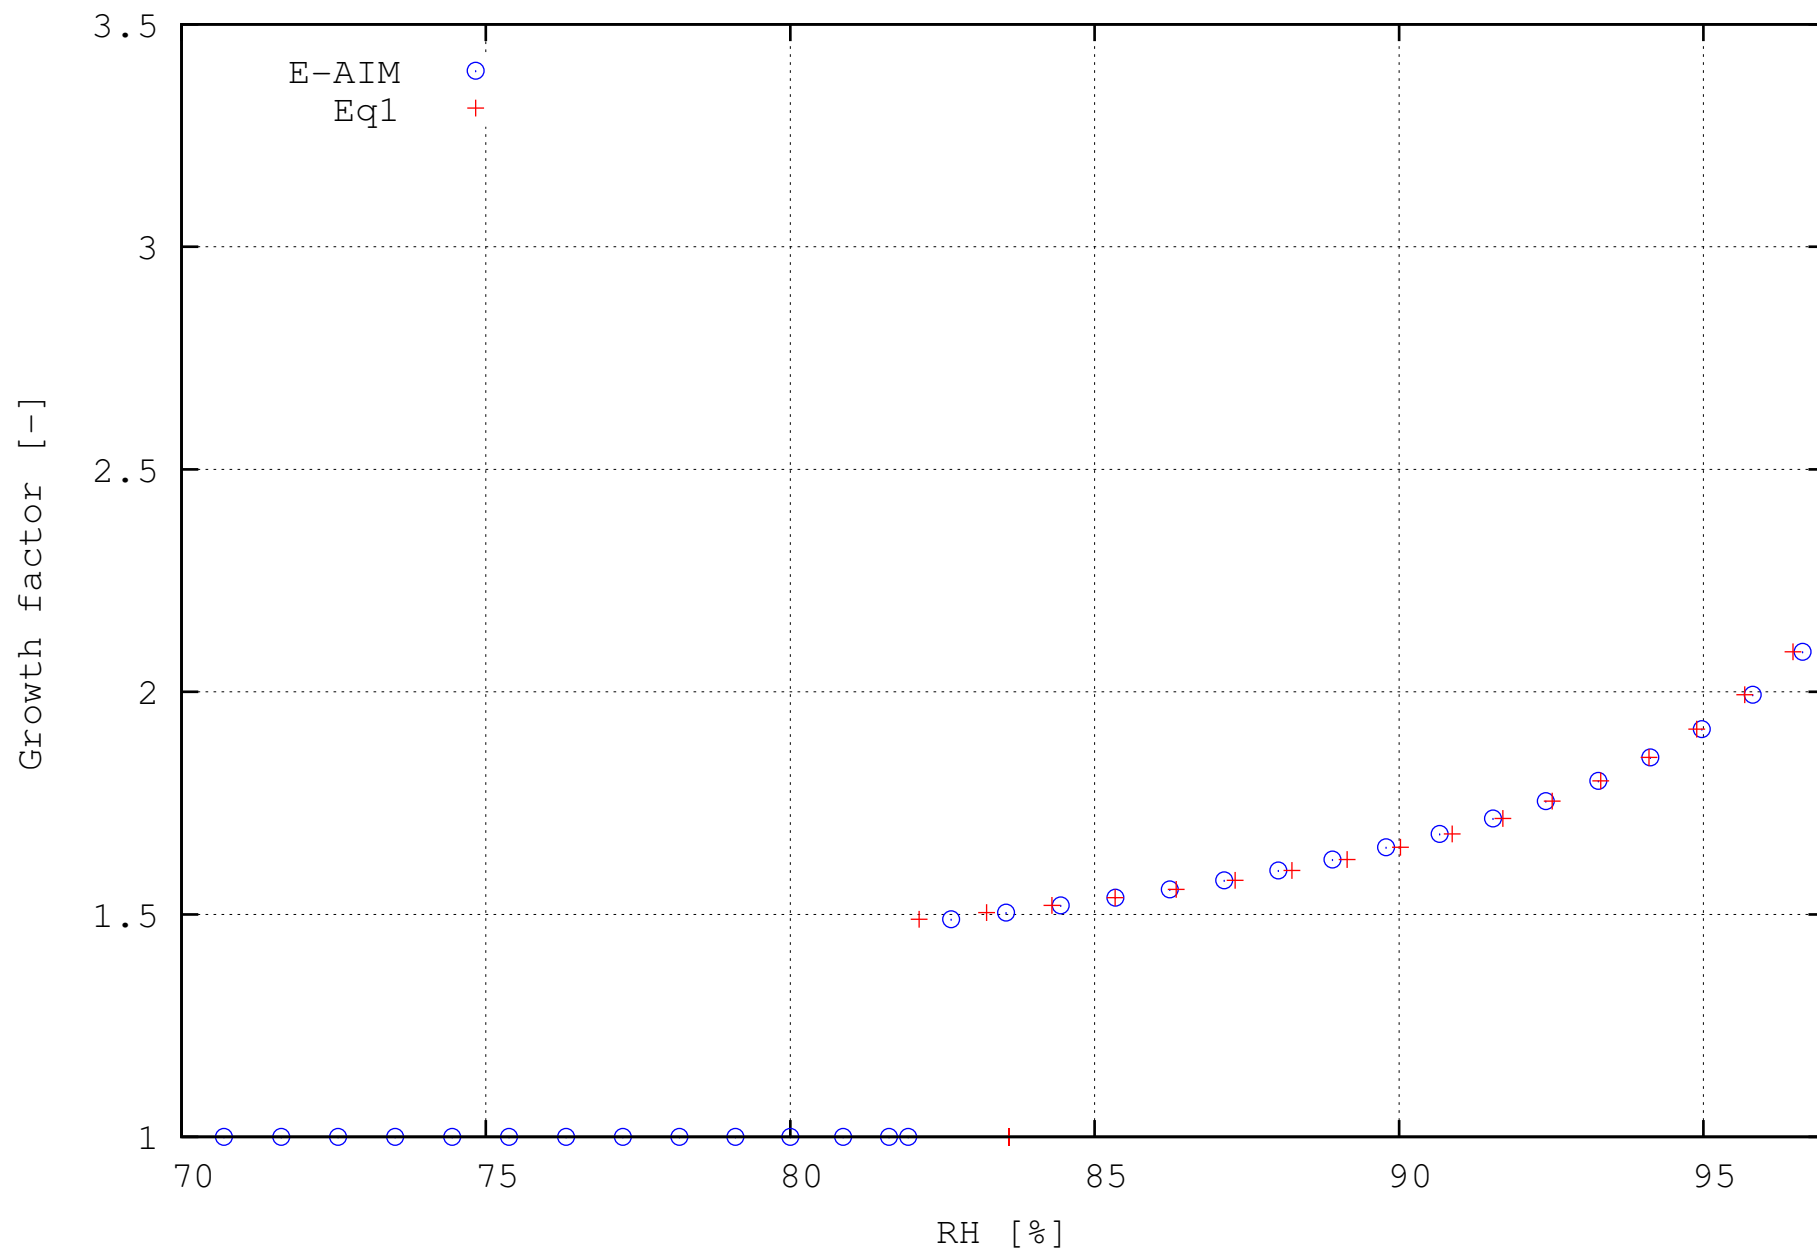

NH<sub>4</sub>SO<sub>4</sub> with dry diameter d=0.05[μm] at T=298.15 [K] - v<sub>i</sub> = 1.661410

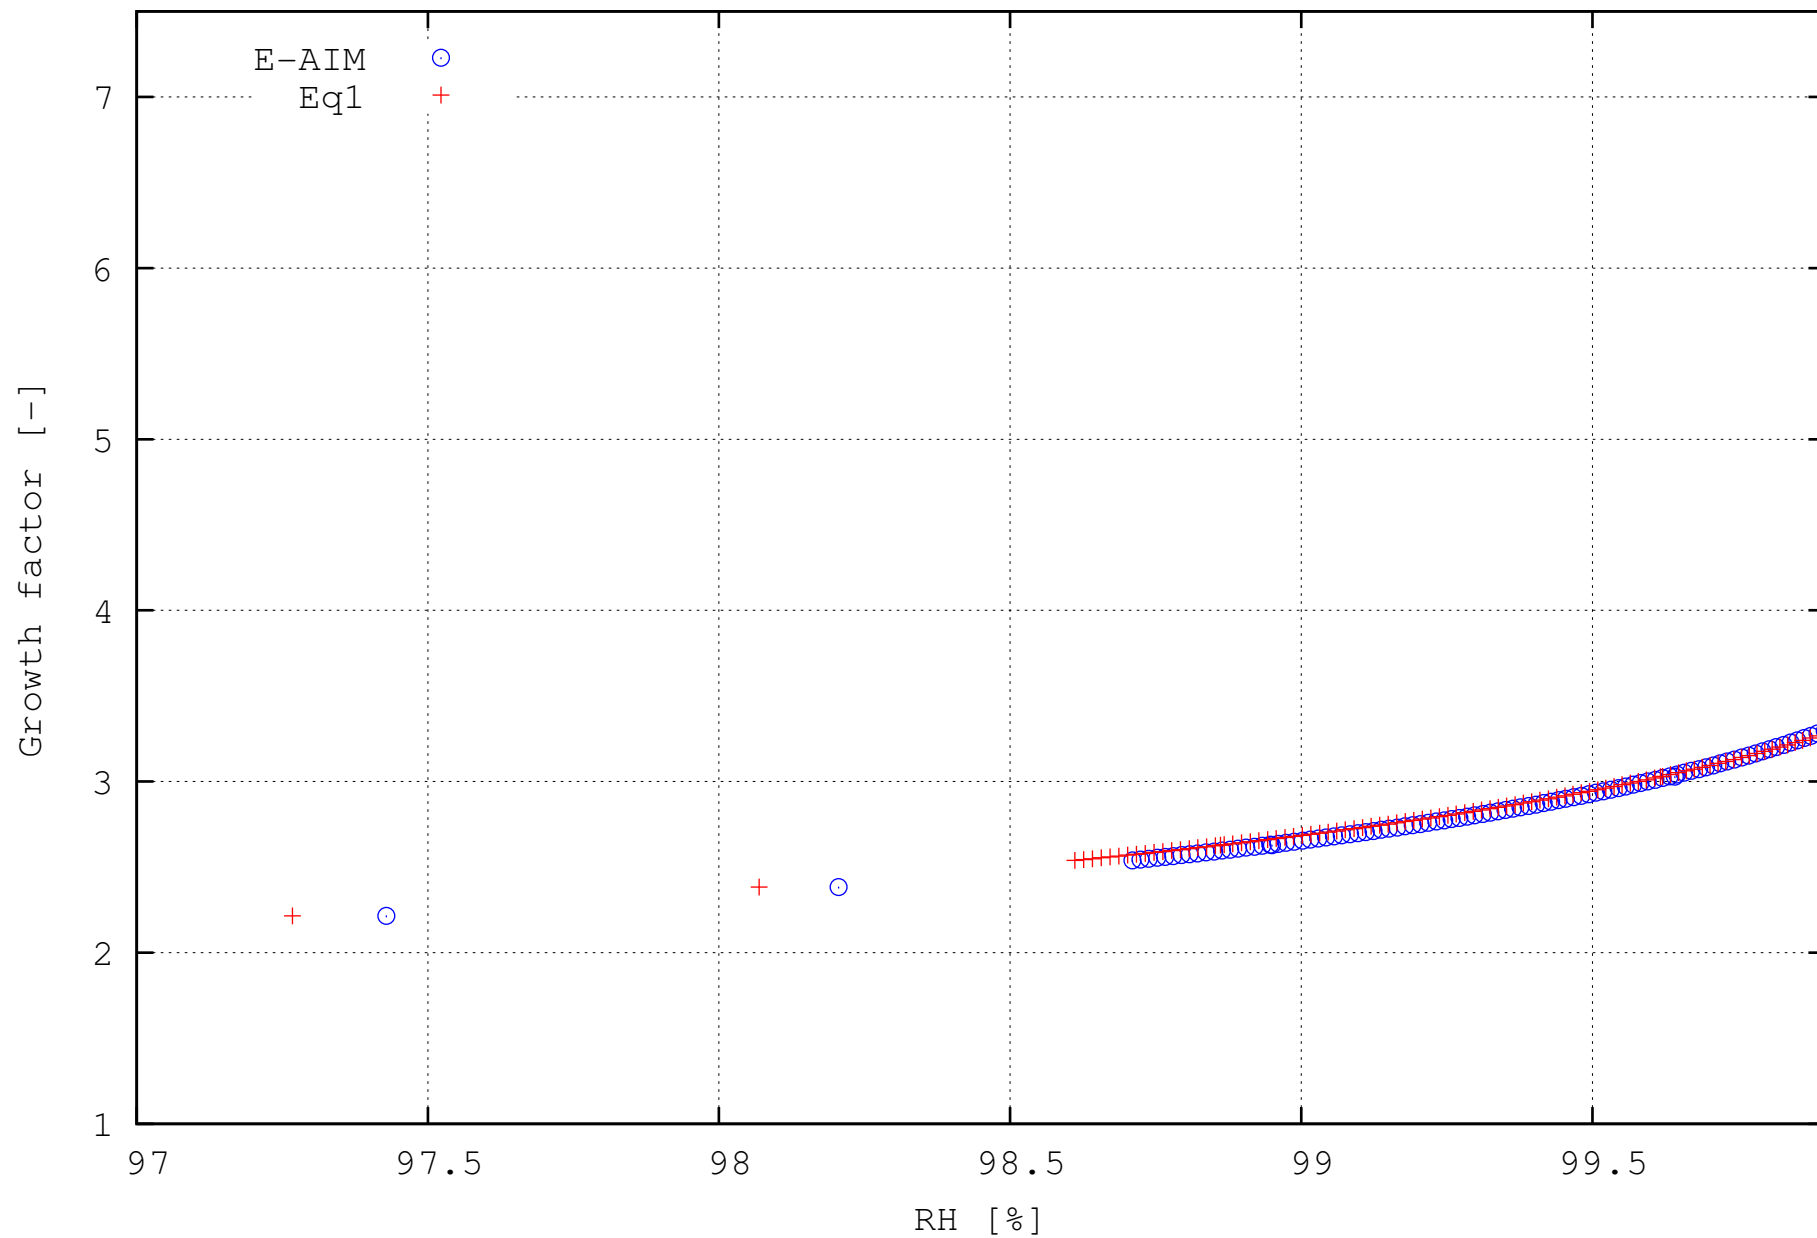

NH<sub>4</sub>2SO<sub>4</sub> with dry diameter d=0.05[μm] at T=298.15 [K] - v<sub>i</sub> = 1.661410

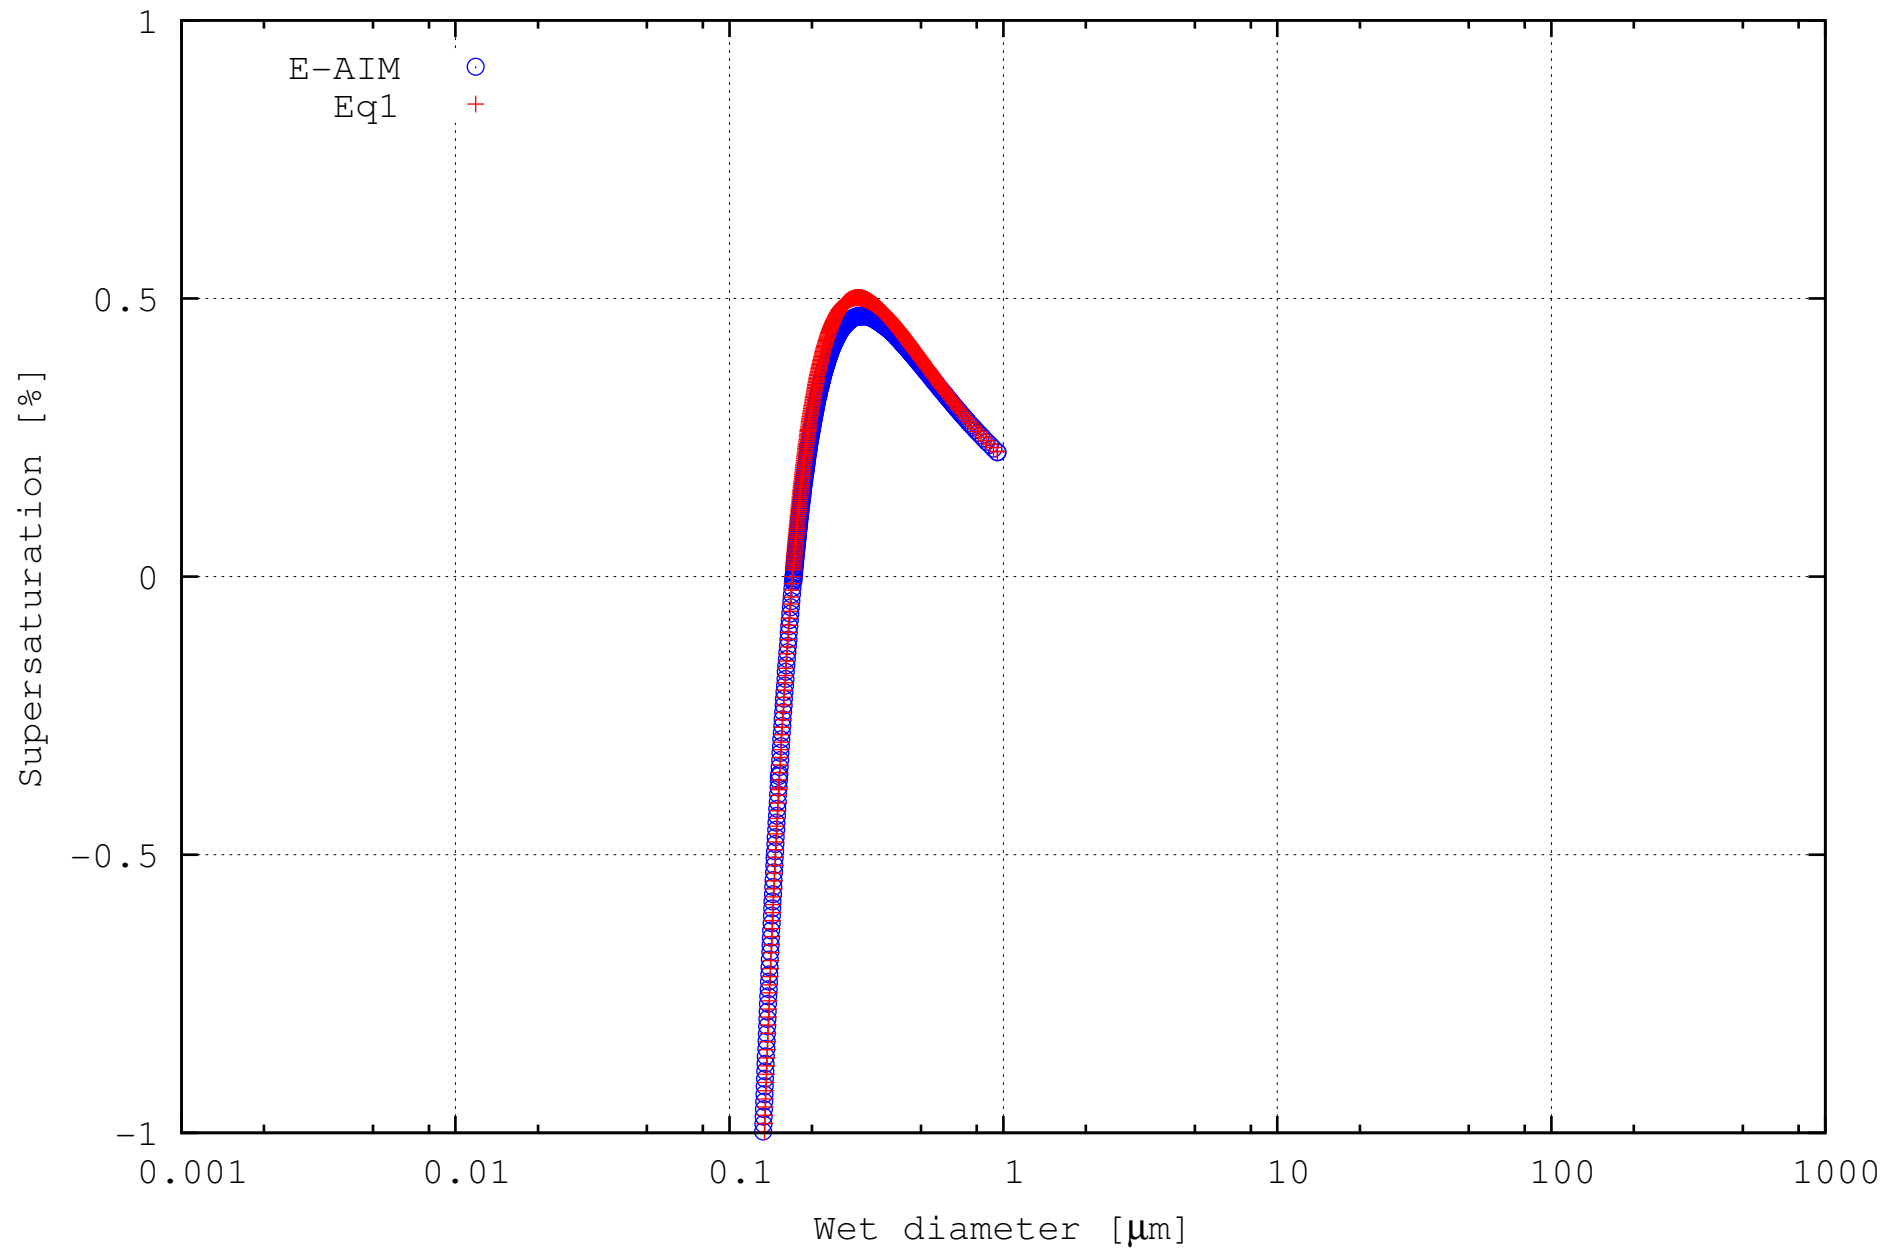

Supplement: Supplementary file 1 [file test_Eq1_NH42SO4_0.05um.pdf › supplement/plots/test_Eq1_NH42SO4_0.05um.pdf]
