# Supplementary material for: New representation of water activity based on a single solute specific constant to parameterize the hygroscopic growth of aerosols in atmospheric models
Source: Copernicus journal article supplement (doi:10.5194/acp-12-5429-2012), 2012-06-22

NaCl with dry diameter  $d=1[\mu\text{m}]$  at  $T=298.15\text{ [K]}$  -  $v_i = 1.737506$

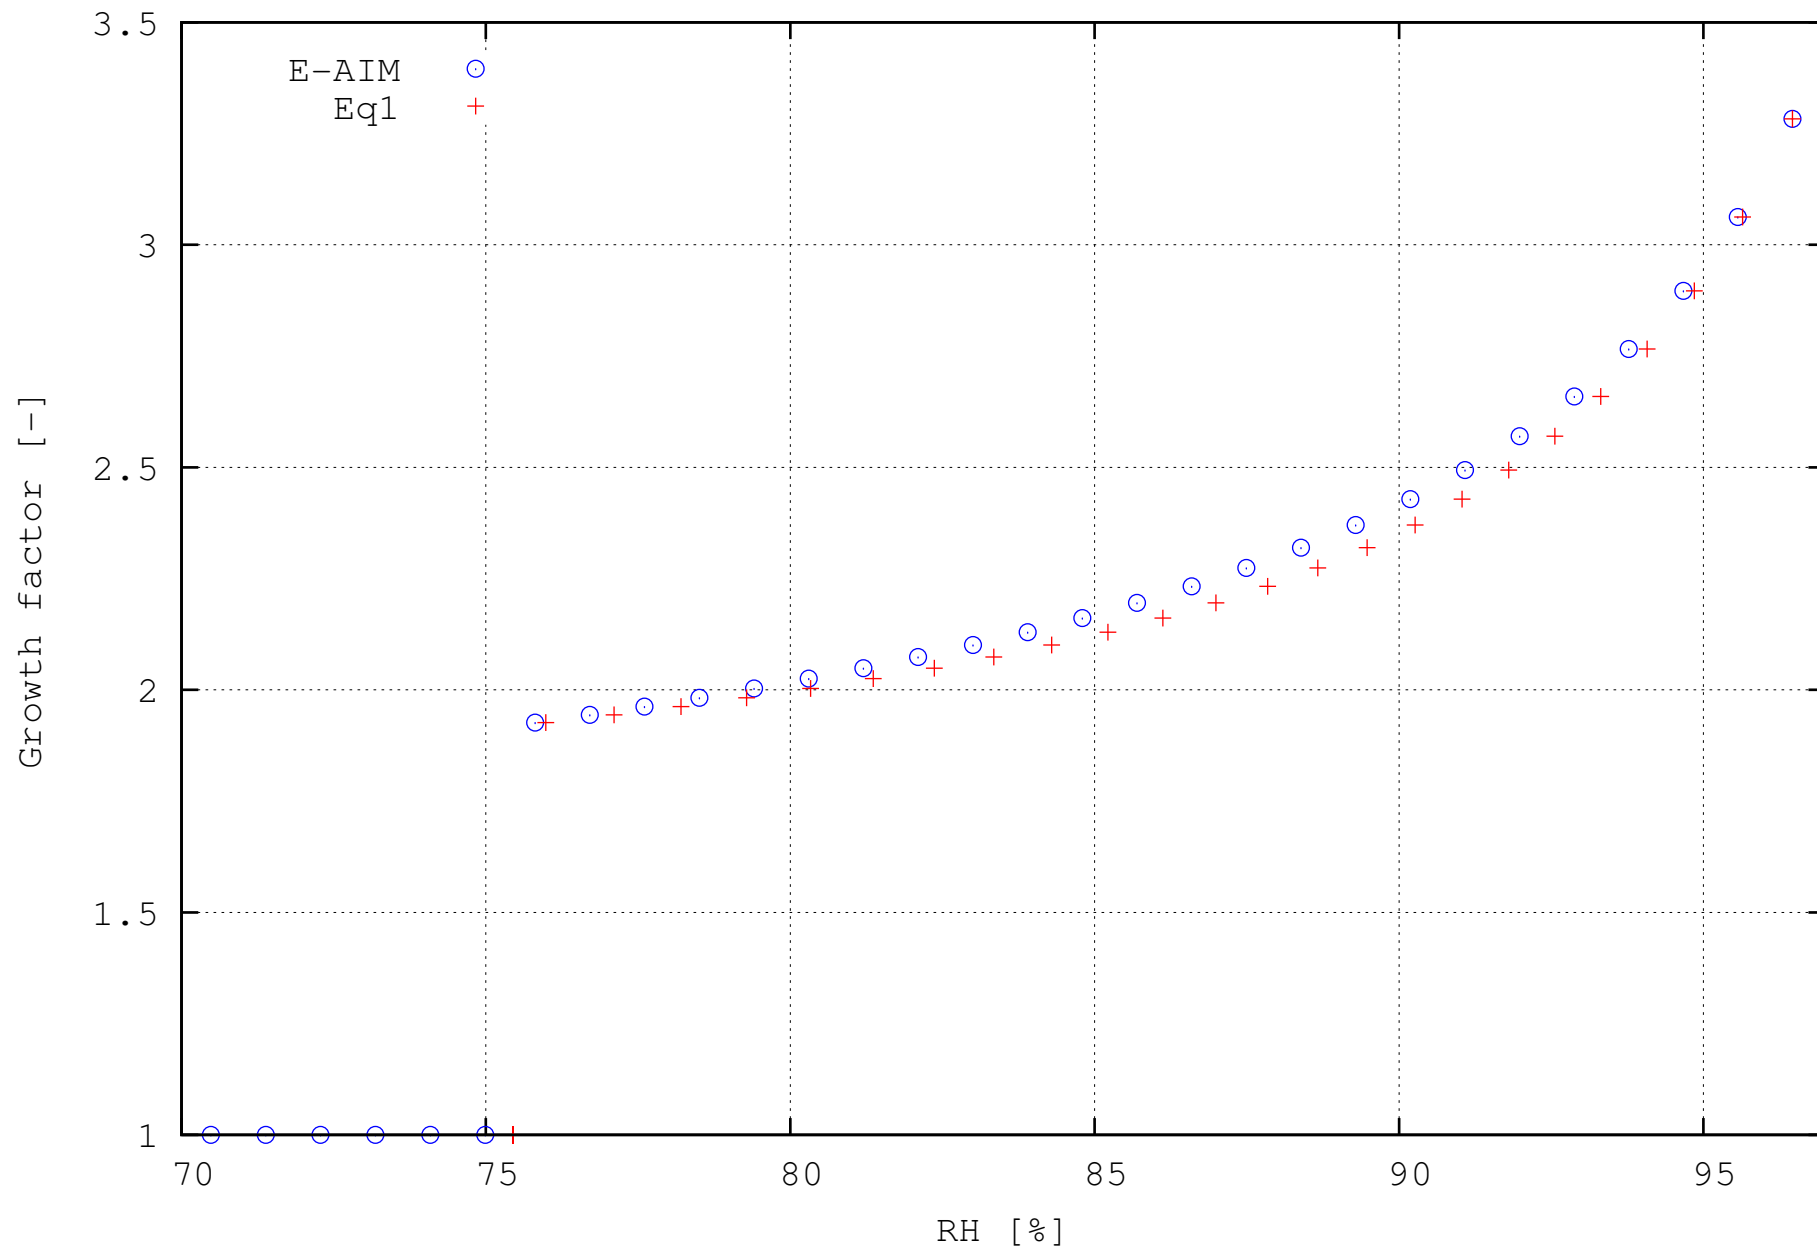

NaCl with dry diameter  $d=1[\mu\text{m}]$  at  $T=298.15$  [K] -  $v_i = 1.737506$

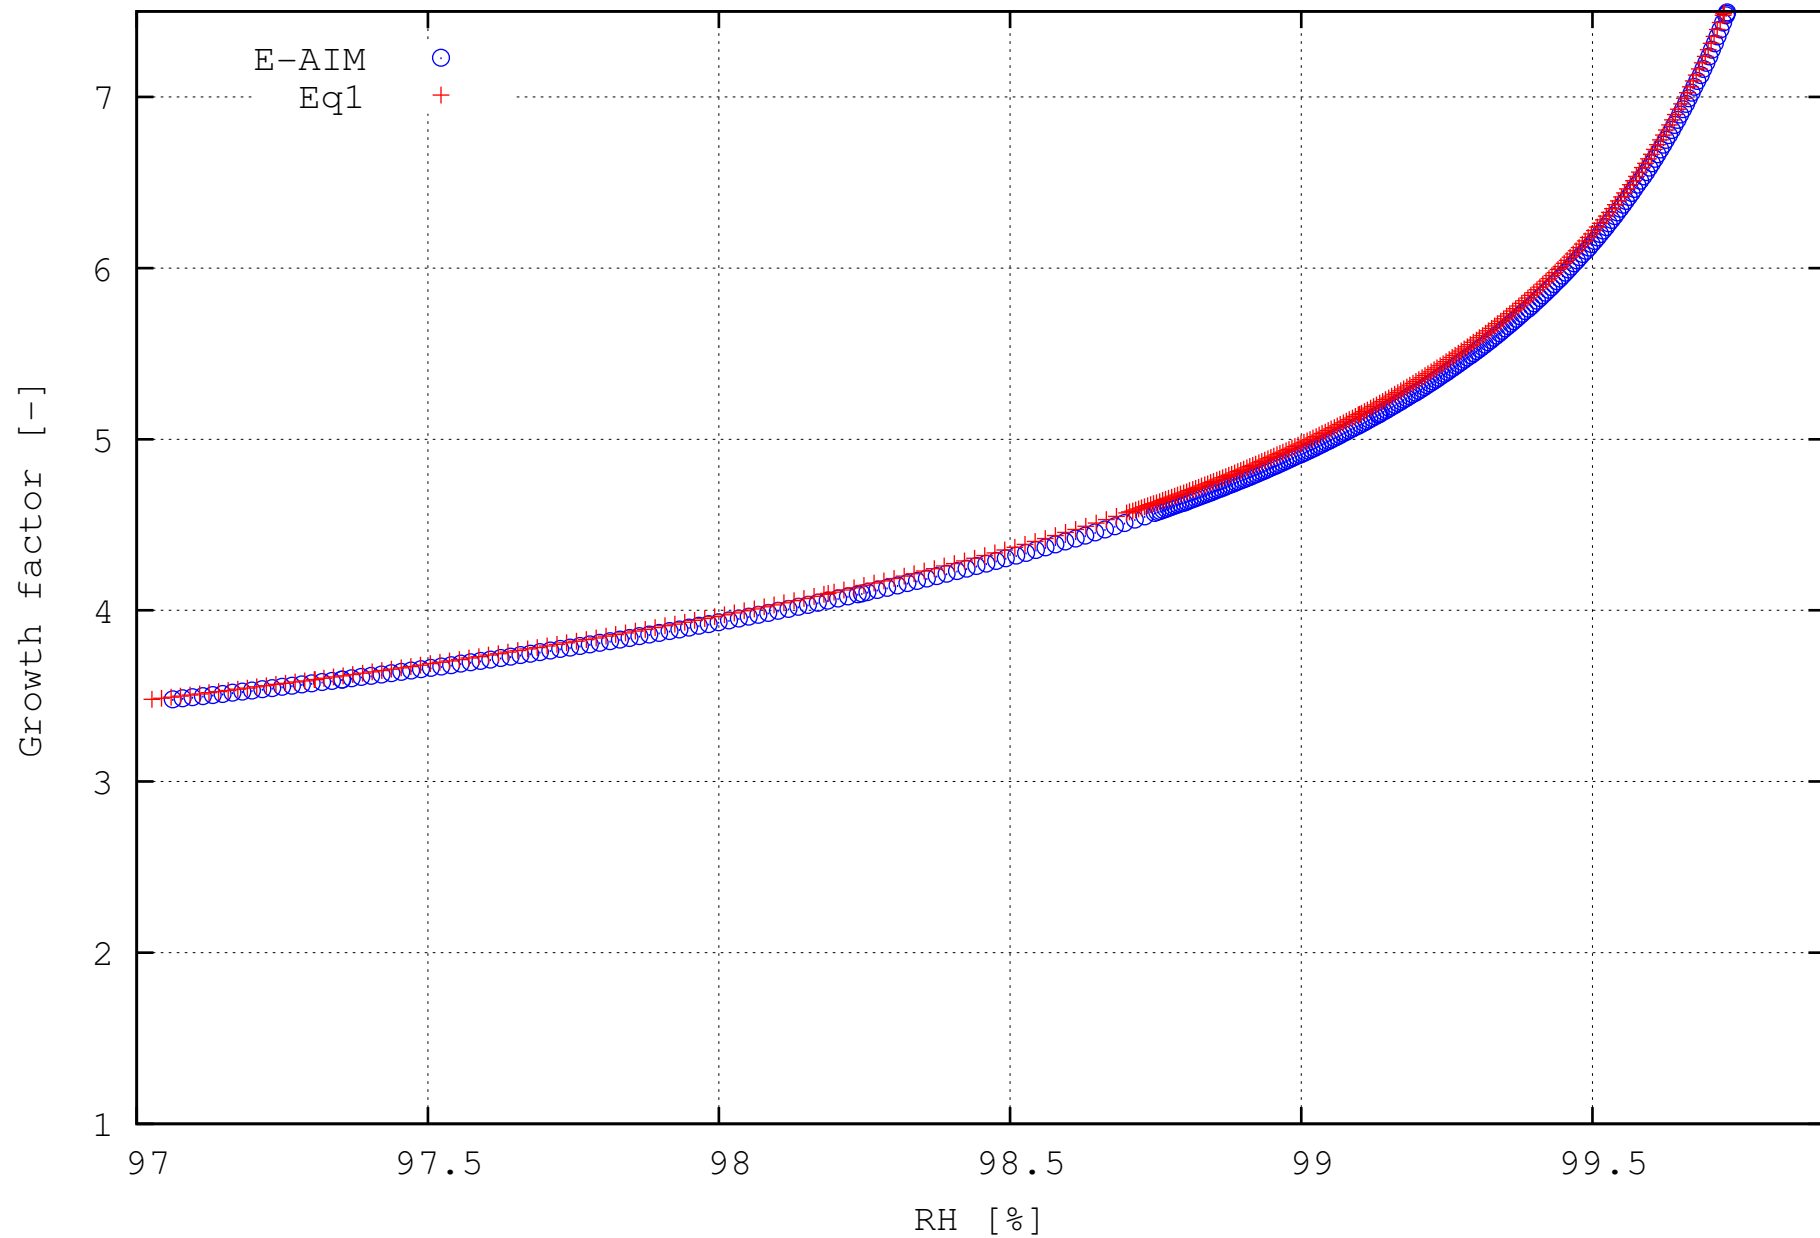

NaCl with dry diameter  $d=1[\mu\text{m}]$  at  $T=298.15\text{ [K]}$  -  $v_i = 1.737506$

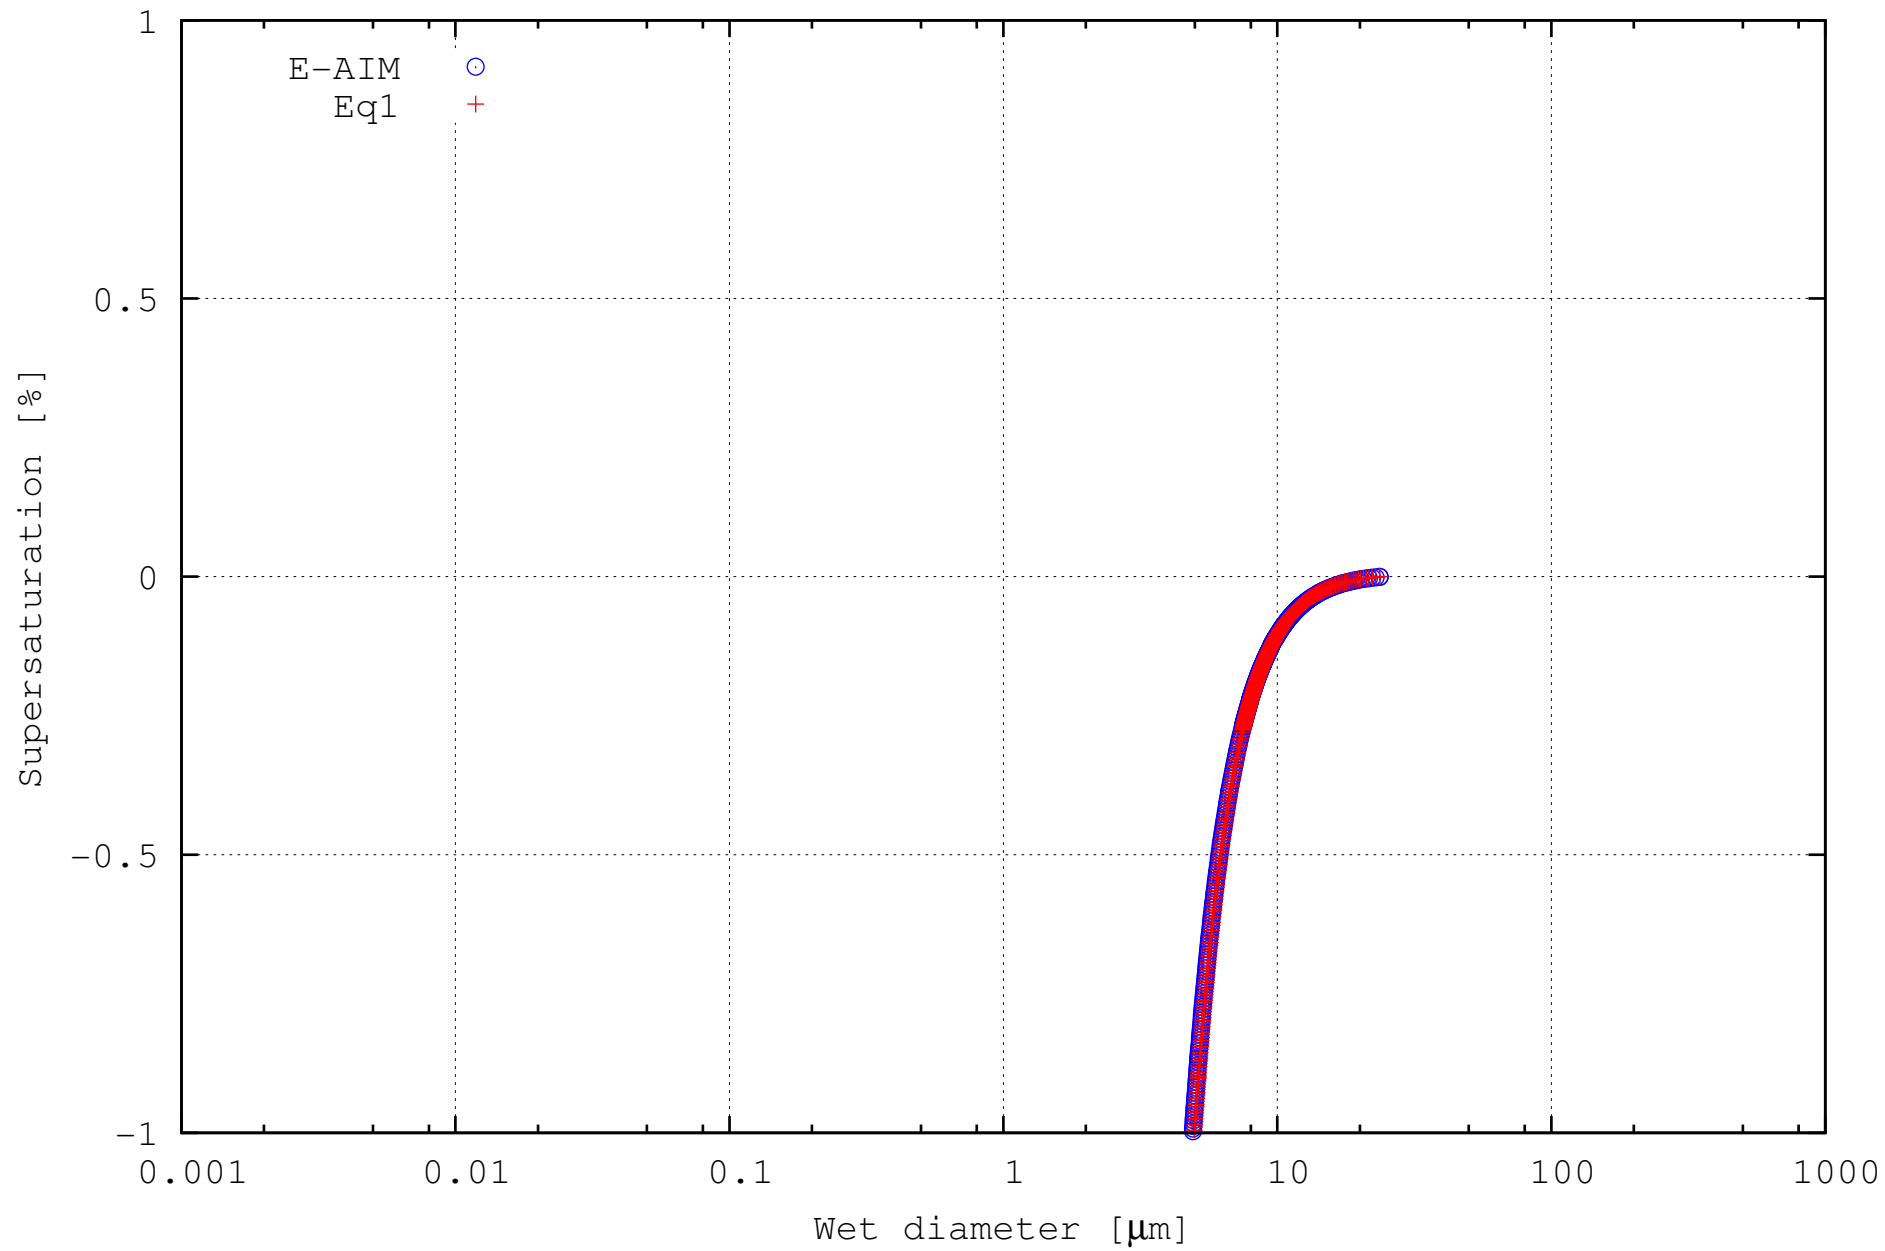

Supplement: Supplementary file 4 [file test_Eq1_NaCl_1um.pdf › supplement/plots/test_Eq1_NaCl_1um.pdf]
