# Supplementary material for: New representation of water activity based on a single solute specific constant to parameterize the hygroscopic growth of aerosols in atmospheric models
Source: Copernicus journal article supplement (doi:10.5194/acp-12-5429-2012), 2012-06-22

NH<sub>4</sub>2SO<sub>4</sub> with dry diameter d=0.05[μm] at T=298.15 [K] - Kappa = 0.61

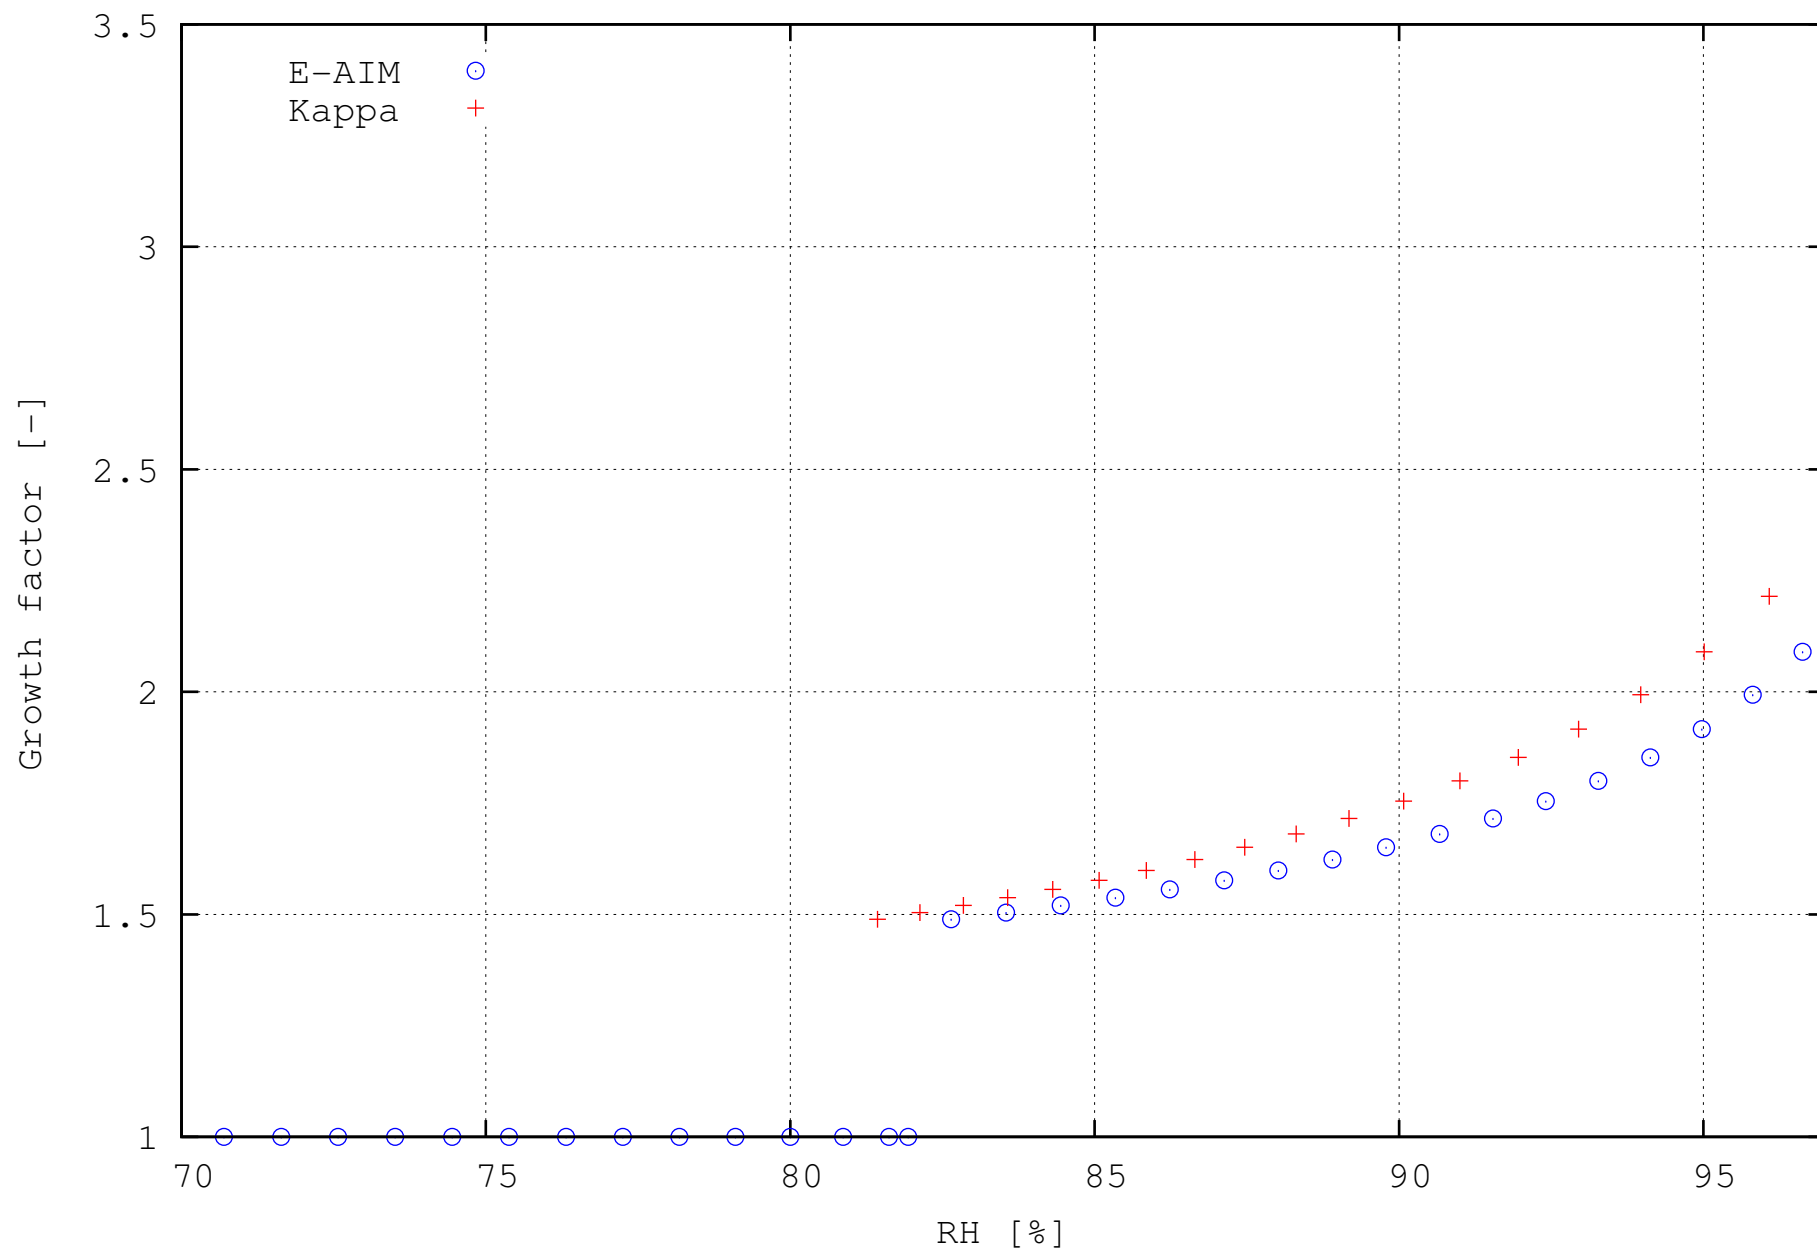

NH<sub>4</sub>SO<sub>4</sub> with dry diameter  $d=0.05[\mu\text{m}]$  at  $T=298.15\text{ [K]}$  -  $\text{Kappa} = 0.61$

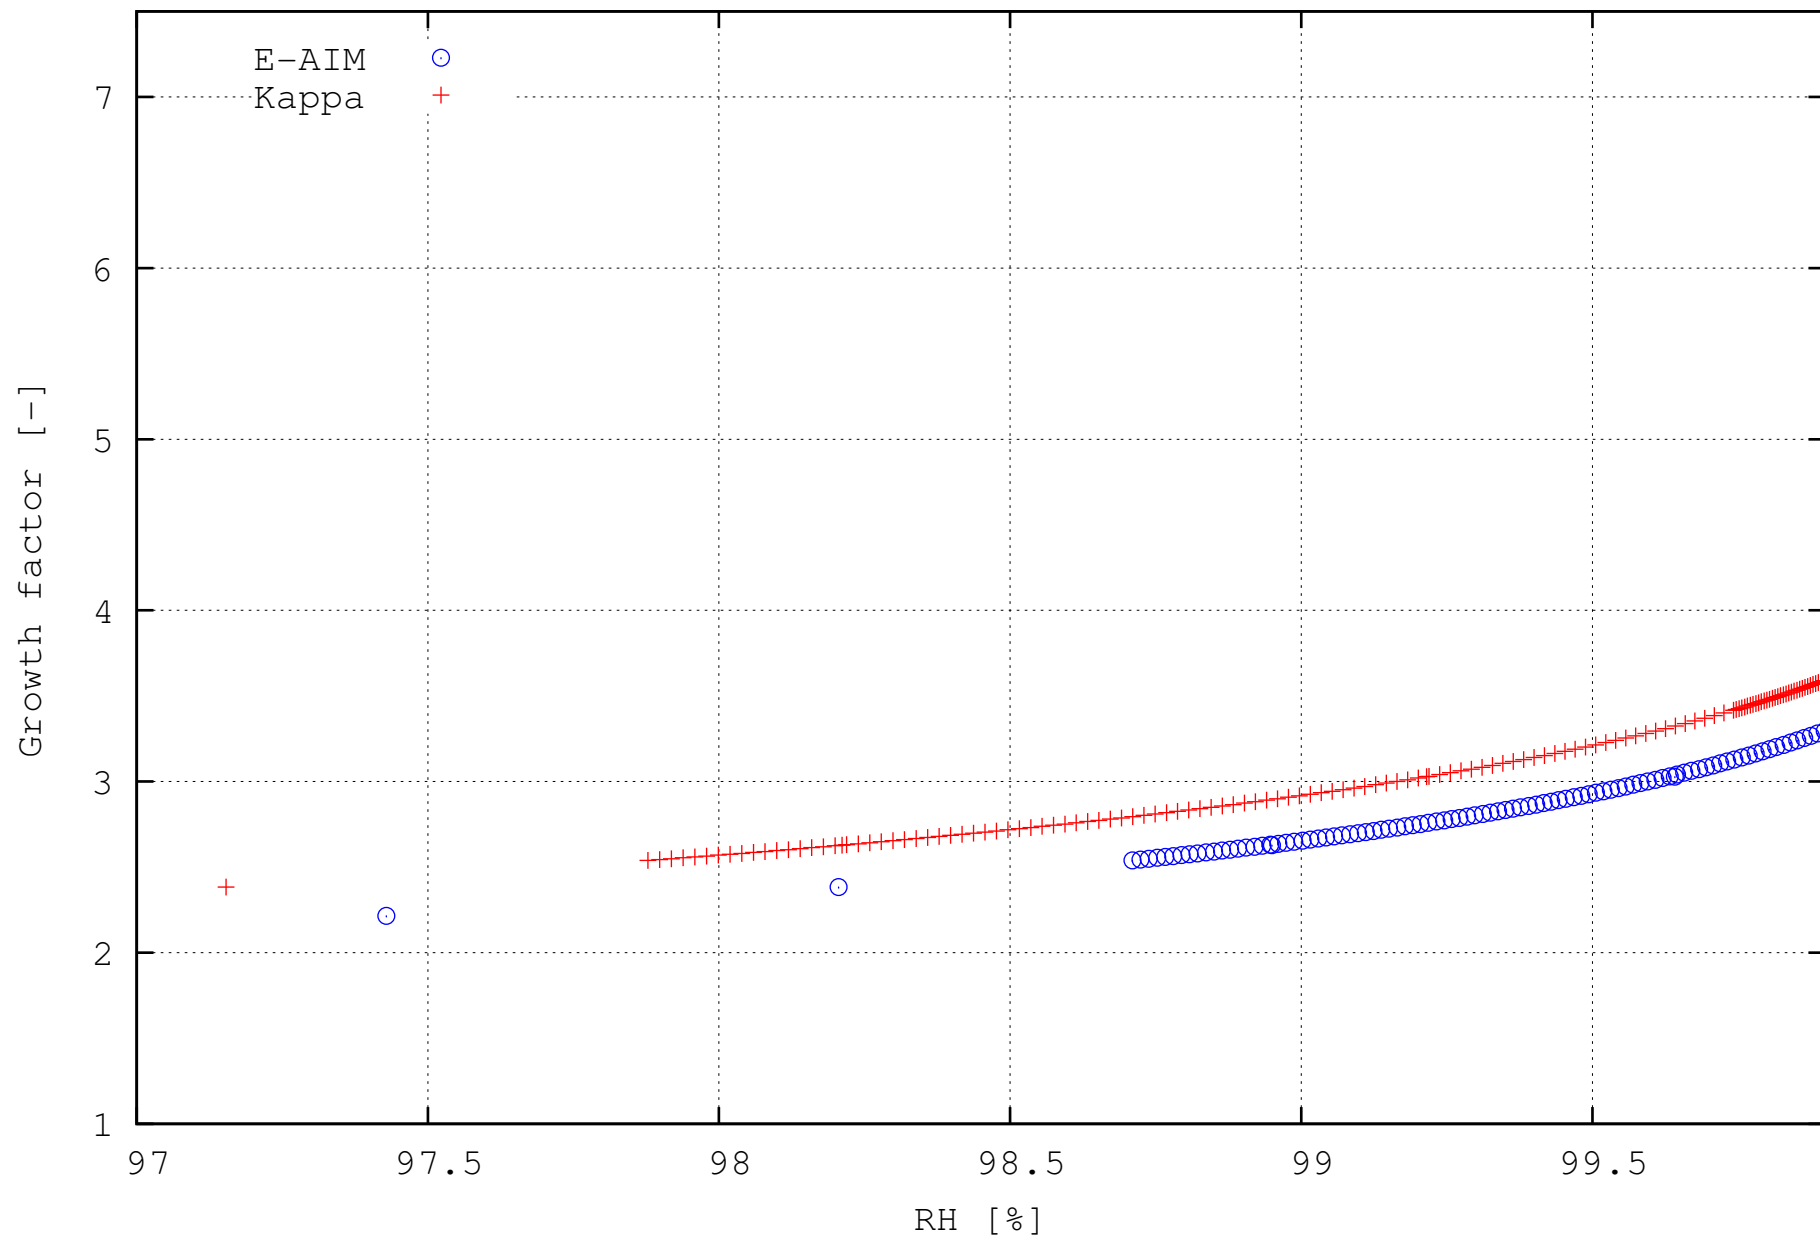

NH<sub>4</sub>2SO<sub>4</sub> with dry diameter d=0.05[μm] at T=298.15 [K] - Kappa = 0.61

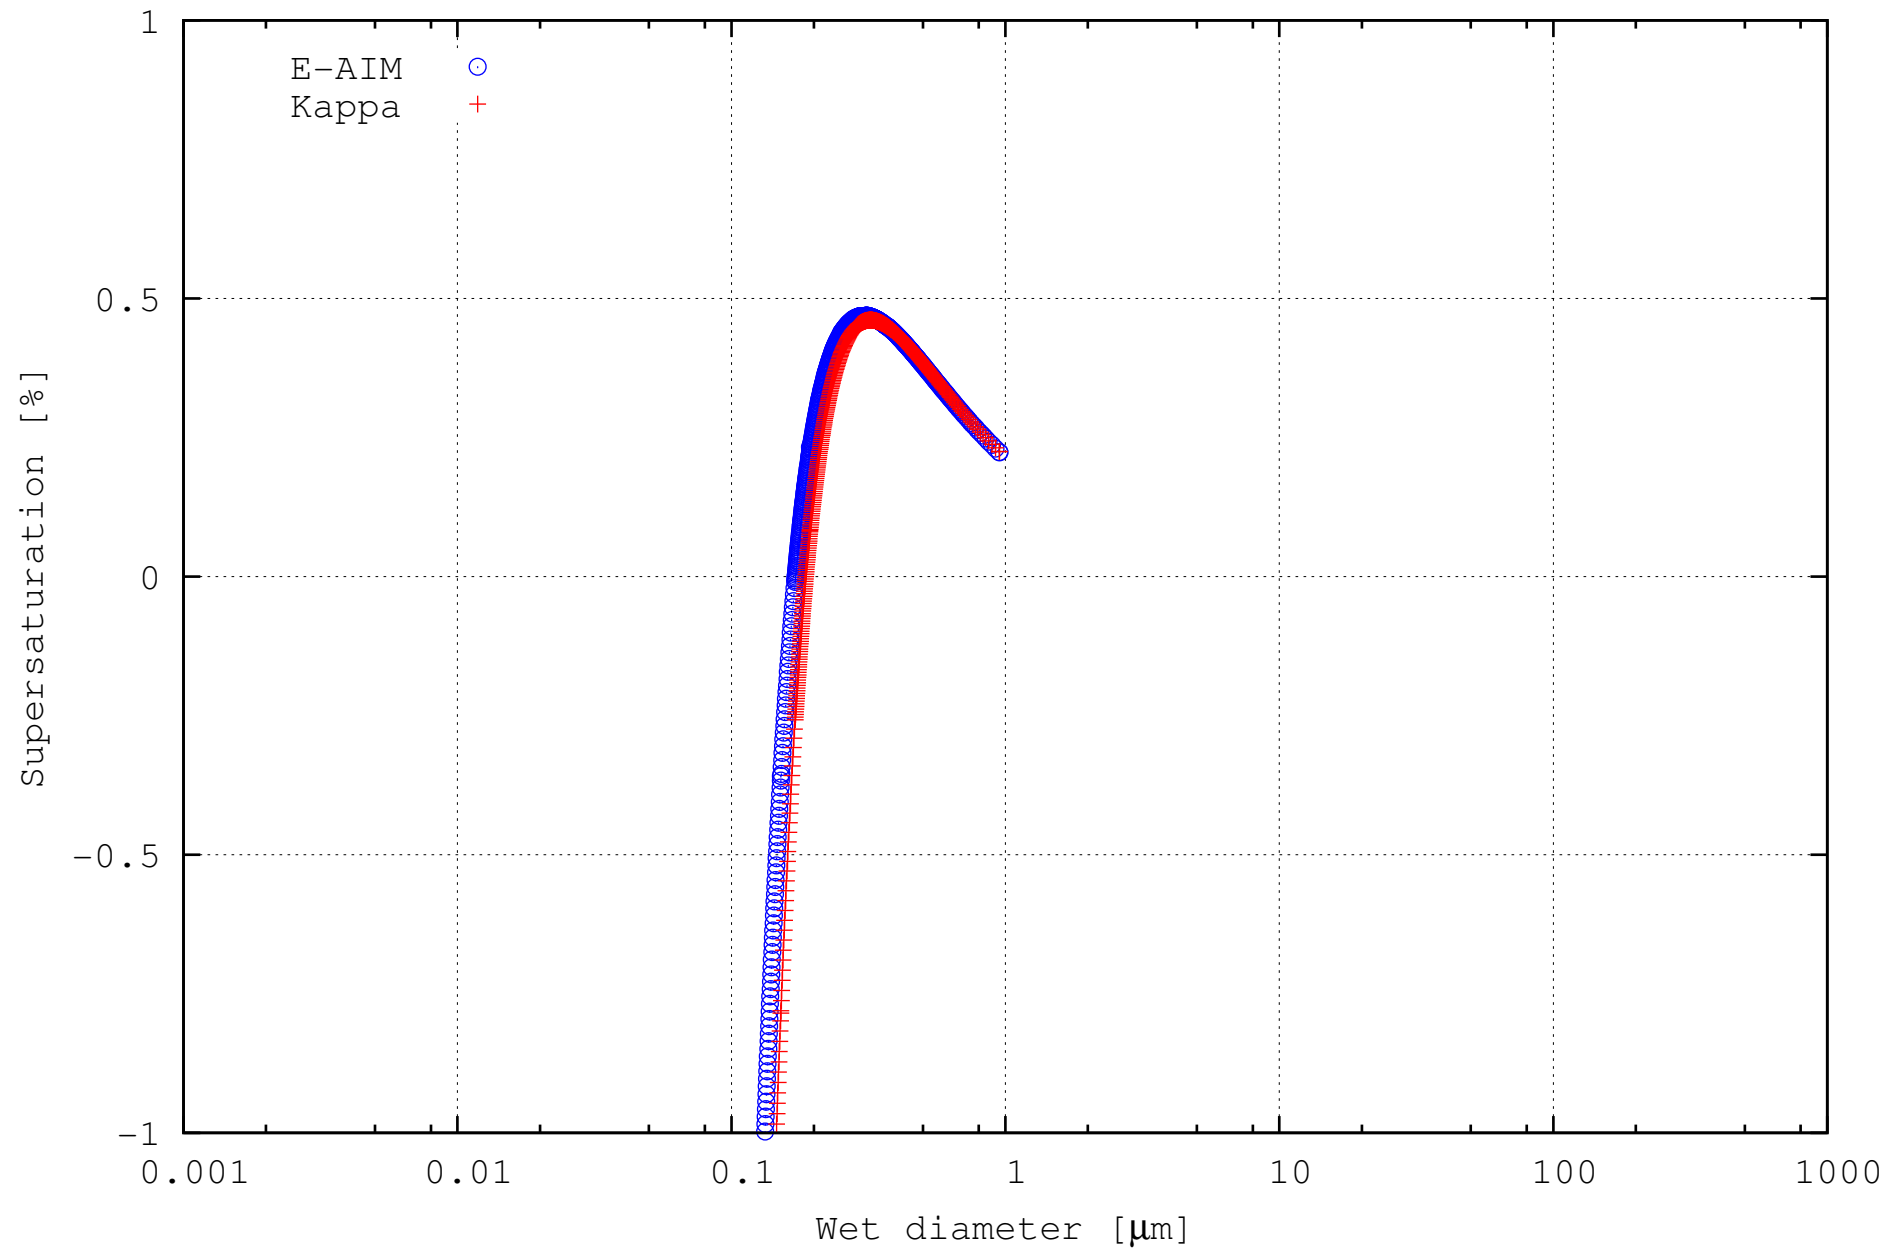

Supplement: Supplementary file 5 [file test_Kappa_NH42SO4_0.05um.pdf › supplement/plots/test_Kappa_NH42SO4_0.05um.pdf]
