# Supplementary material for: New representation of water activity based on a single solute specific constant to parameterize the hygroscopic growth of aerosols in atmospheric models
Source: Copernicus journal article supplement (doi:10.5194/acp-12-5429-2012), 2012-06-22

NaCl with dry diameter  $d=0.05[\mu\text{m}]$  at  $T=298.15$  [K] -  $\text{Kappa} = 1.28$

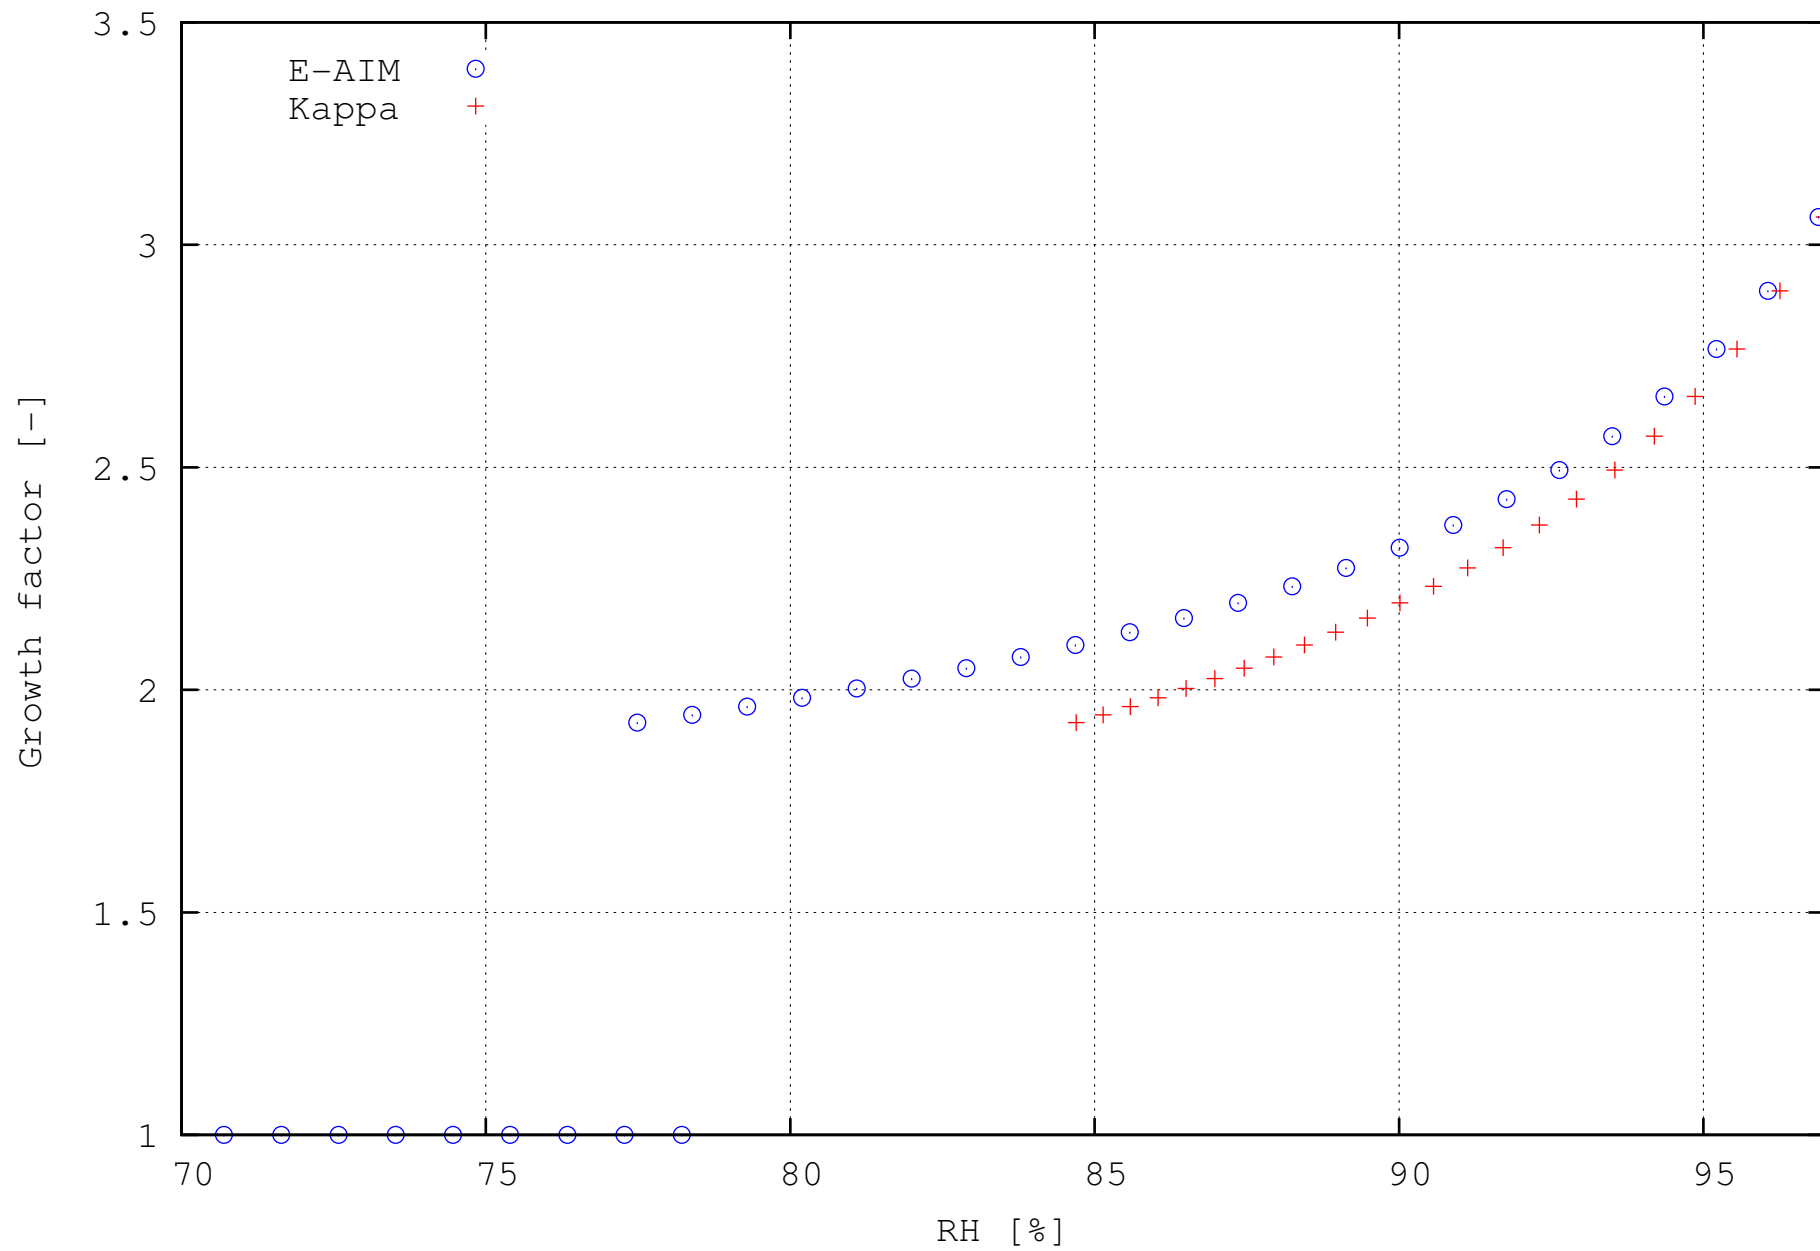

NaCl with dry diameter  $d=0.05[\mu\text{m}]$  at  $T=298.15$  [K] -  $\text{Kappa} = 1.28$

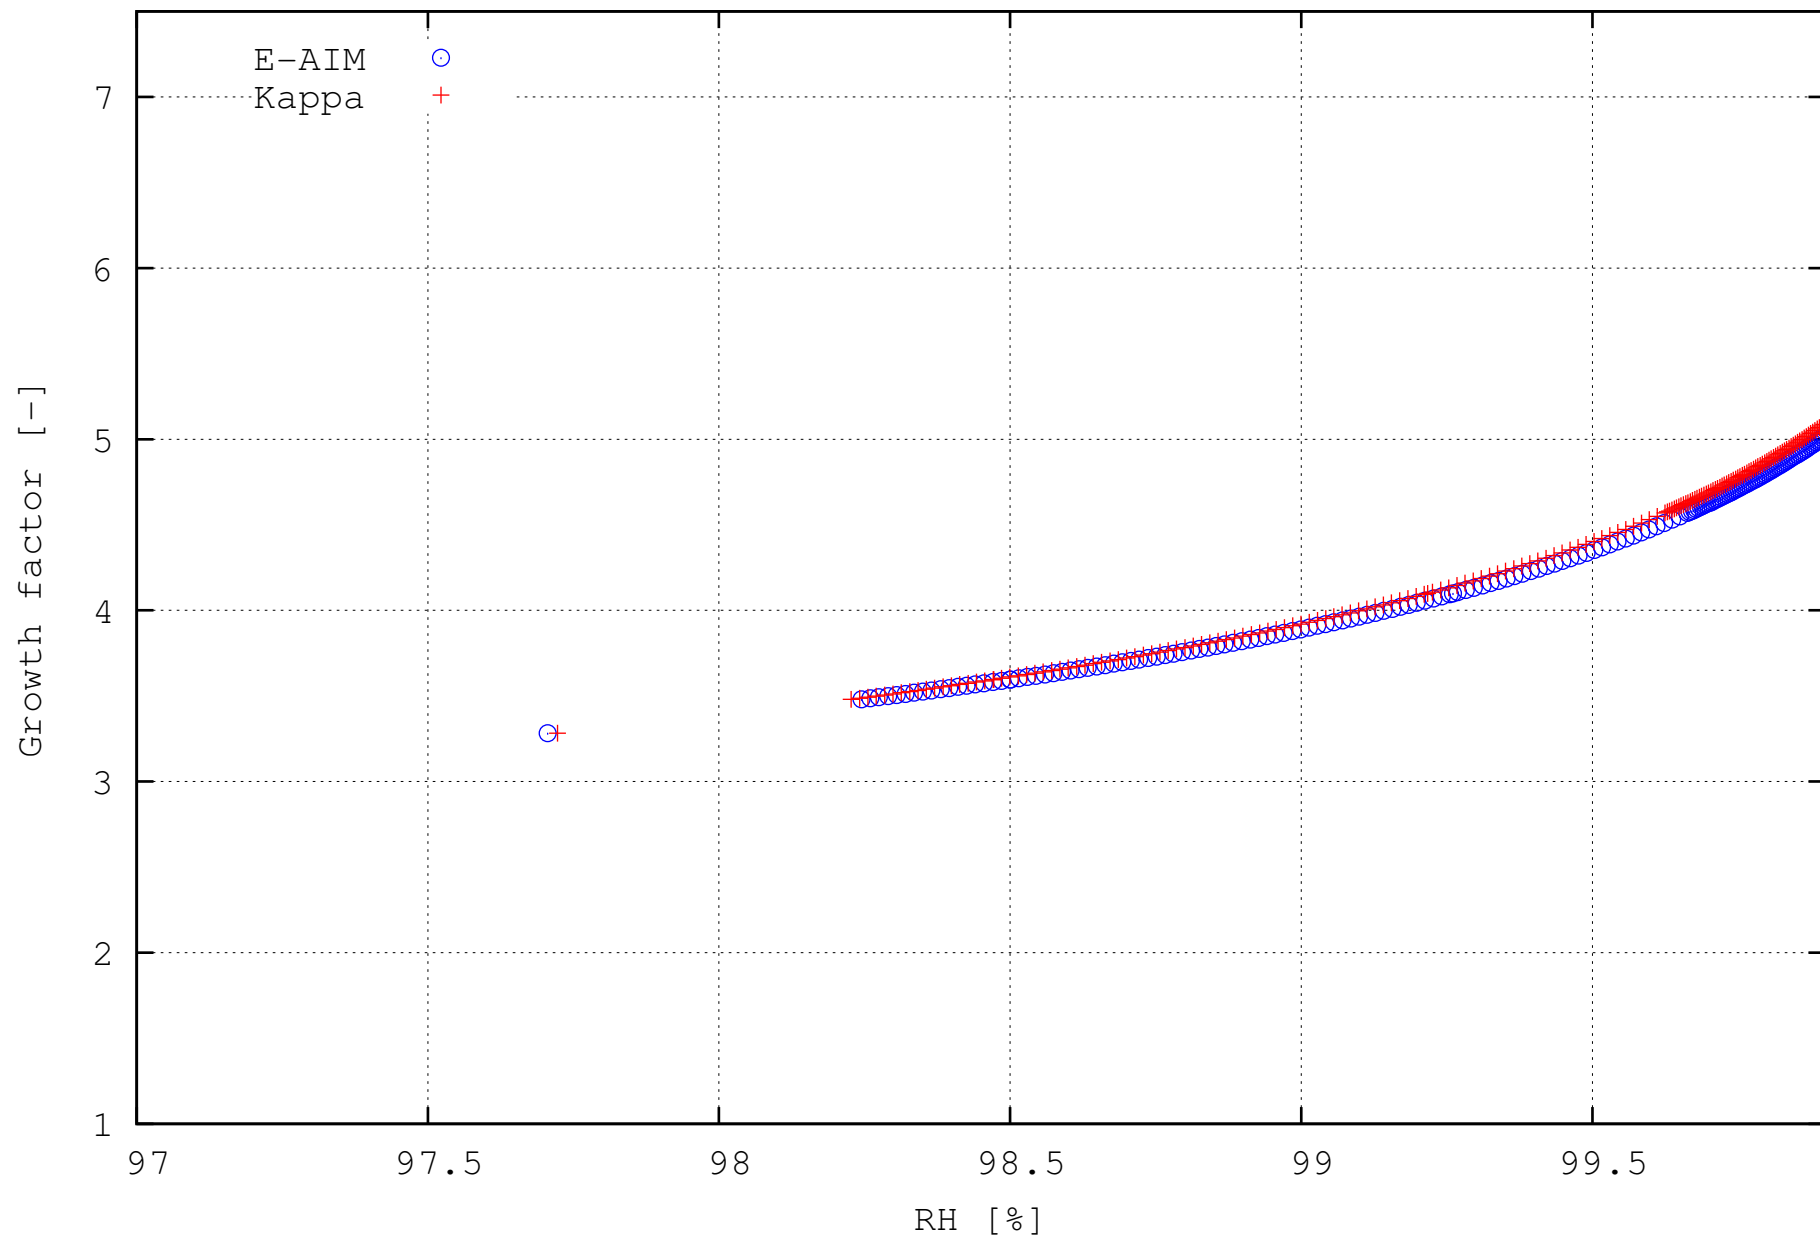

NaCl with dry diameter  $d=0.05\text{ }\mu\text{m}$  at  $T=298.15\text{ [K]}$  -  $\text{Kappa} = 1.28$

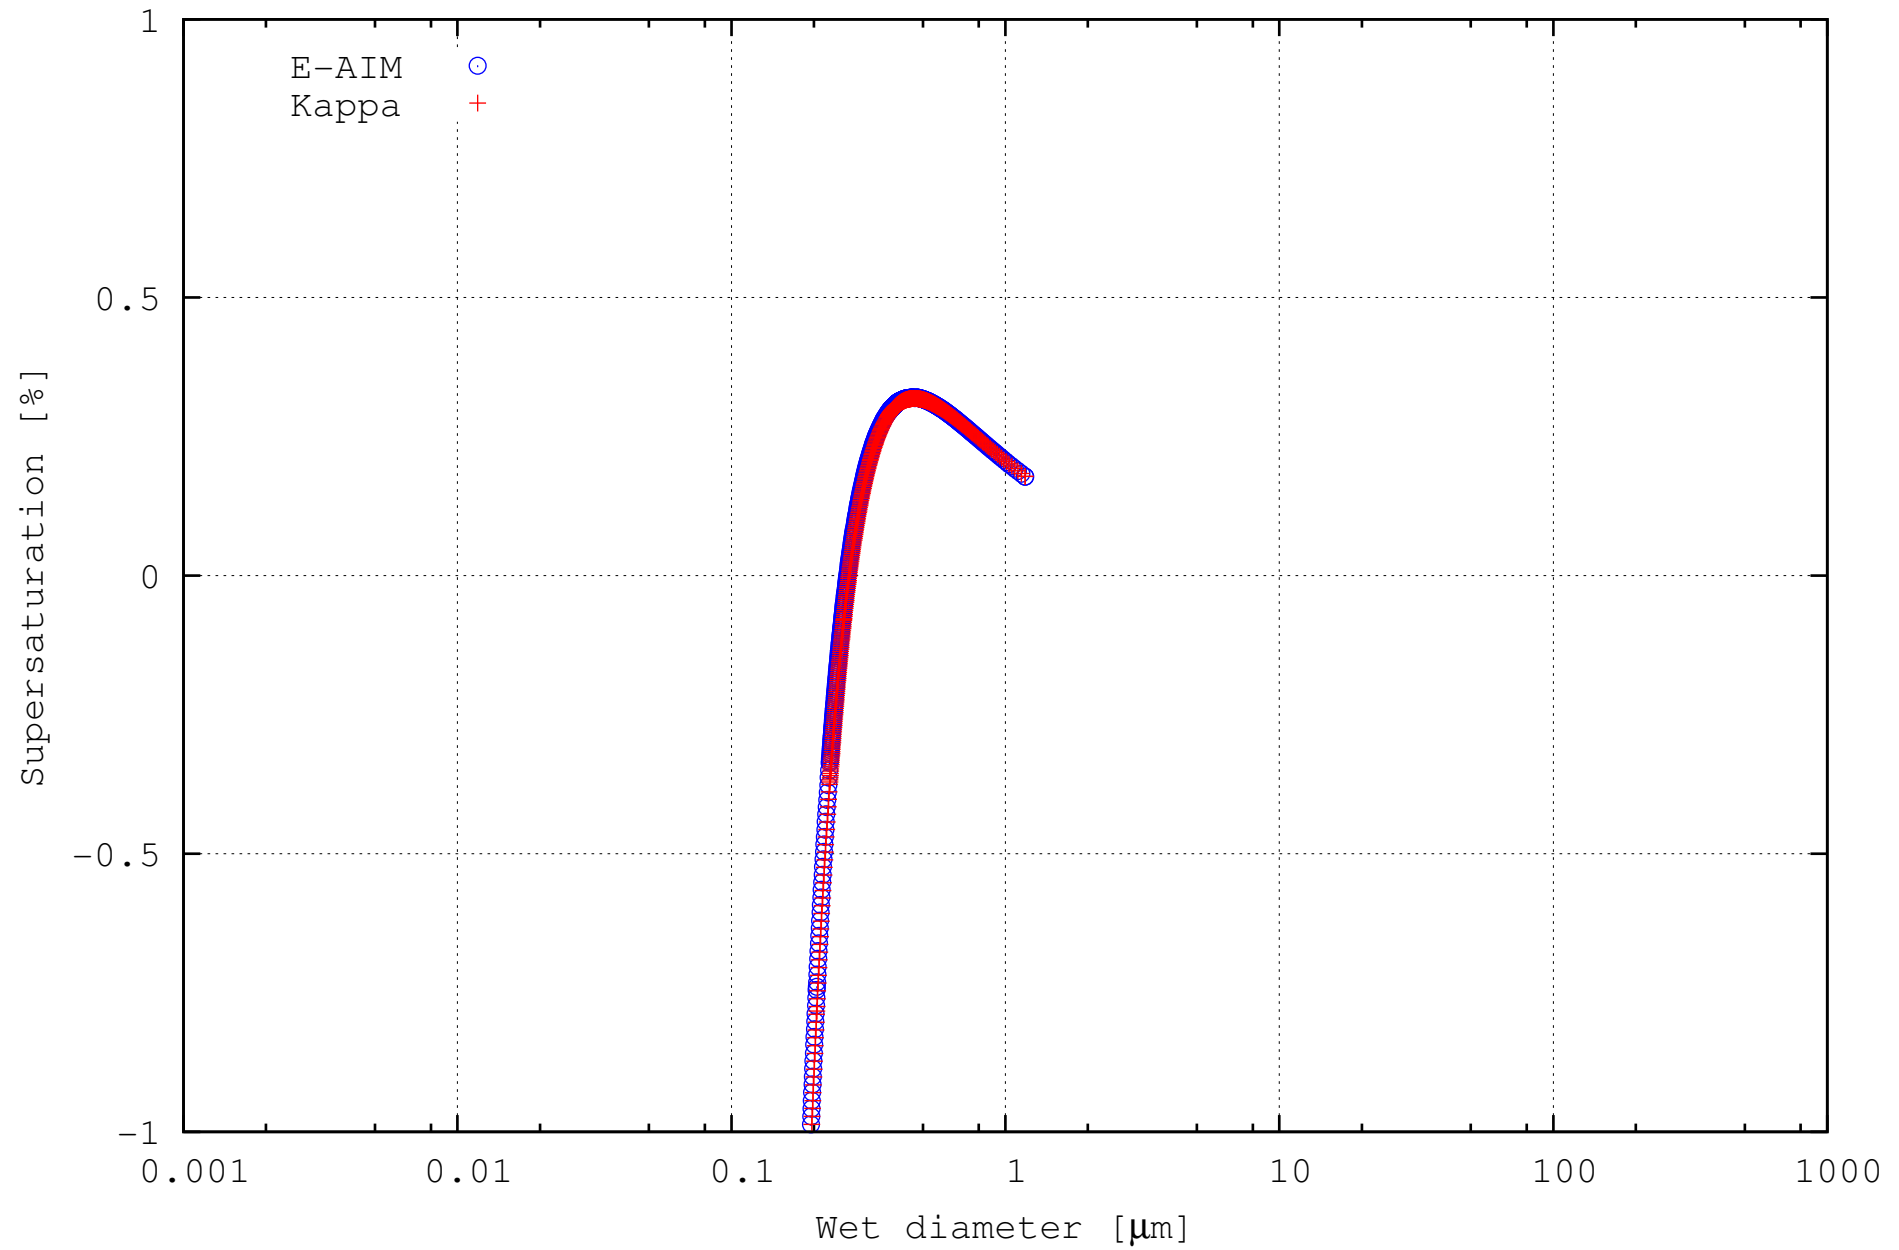

Supplement: Supplementary file 7 [file test_Kappa_NaCl_0.05um.pdf › supplement/plots/test_Kappa_NaCl_0.05um.pdf]
